# Supplementary material for: Geophysical Insights from the First Geomagnetic Field Absolute Intensity Curve for Central Asia (2200BCE – 2000CE), and Implications for Archaeomagnetic Dating
Source: Research Square preprint supplement (doi:10.21203/rs.3.rs-6967561/v1), 2025-07-09
Supplement: Supplementary file 1 [file 4d10ba6a7470c4d0c78791f4.xlsx]

## Sheet: Hoja1
t	F	eF
-2200	54.8885	7.15422
-2190	54.8192	6.95331
-2180	54.722	6.81137
-2170	54.5935	6.72593
-2160	54.4303	6.69302
-2150	54.2291	6.70768
-2140	53.9866	6.76661
-2130	53.6999	6.87147
-2120	53.3665	7.02348
-2110	52.9836	7.22139
-2100	52.5486	7.462
-2090	52.0602	7.74146
-2080	51.5222	8.05196
-2070	50.94	8.37863
-2060	50.3186	8.70066
-2050	49.6634	8.99423
-2040	48.9821	9.23549
-2030	48.2924	9.3982
-2020	47.6145	9.45151
-2010	46.9686	9.3637
-2000	46.375	9.10975
-1990	45.8502	8.69808
-1980	45.3974	8.21043
-1970	45.0159	7.72905
-1960	44.7052	7.30338
-1950	44.4648	6.94392
-1940	44.2918	6.6525
-1930	44.1738	6.48076
-1920	44.0962	6.45585
-1910	44.044	6.53802
-1900	44.0027	6.63646
-1890	43.9596	6.67858
-1880	43.9113	6.69929
-1870	43.8565	6.74117
-1860	43.7939	6.79918
-1850	43.722	6.82254
-1840	43.641	6.77095
-1830	43.5553	6.70564
-1820	43.4708	6.69212
-1810	43.3934	6.73939
-1800	43.3289	6.79714
-1790	43.2836	6.81312
-1780	43.2651	6.83061
-1770	43.2818	6.89779
-1760	43.3417	7.01176
-1750	43.4531	7.11801
-1740	43.6219	7.1601
-1730	43.8455	7.16402
-1720	44.1191	7.16554
-1710	44.4378	7.16384
-1700	44.797	7.1187
-1690	45.1929	6.99011
-1680	45.6274	6.81444
-1670	46.1033	6.64126
-1660	46.6237	6.48796
-1650	47.1916	6.33254
-1640	47.8054	6.14901
-1630	48.4453	5.9698
-1620	49.087	5.82053
-1610	49.7063	5.67681
-1600	50.279	5.46975
-1590	50.7844	5.15469
-1580	51.217	4.82484
-1570	51.5753	4.58847
-1560	51.8574	4.46848
-1550	52.0617	4.3832
-1540	52.1897	4.24601
-1530	52.2567	4.12783
-1520	52.2811	4.12036
-1510	52.2814	4.21754
-1500	52.2761	4.31187
-1490	52.2793	4.30618
-1480	52.2868	4.26353
-1470	52.2901	4.27394
-1460	52.2805	4.36389
-1450	52.2495	4.50069
-1440	52.191	4.69055
-1430	52.1081	5.072
-1420	52.0067	5.71868
-1410	51.8924	6.55373
-1400	51.771	7.40883
-1390	51.6482	8.12047
-1380	51.5304	8.64013
-1370	51.424	8.96903
-1360	51.3353	9.11833
-1350	51.2709	9.10072
-1340	51.235	8.93062
-1330	51.2244	8.63497
-1320	51.2337	8.24638
-1310	51.2576	7.79793
-1300	51.2907	7.32099
-1290	51.3293	6.8433
-1280	51.3751	6.38902
-1270	51.4315	5.98058
-1260	51.5019	5.63631
-1250	51.5896	5.3676
-1240	51.6979	5.17859
-1230	51.8304	5.07072
-1220	51.9902	5.042
-1210	52.1808	5.08483
-1200	52.4055	5.18675
-1190	52.6666	5.33434
-1180	52.9619	5.51797
-1170	53.288	5.72703
-1160	53.6416	5.94777
-1150	54.0194	6.16386
-1140	54.4181	6.35903
-1130	54.8355	6.52018
-1120	55.2695	6.63375
-1110	55.718	6.68561
-1100	56.1789	6.66349
-1090	56.6511	6.56586
-1080	57.1375	6.41736
-1070	57.6422	6.24775
-1060	58.169	6.08349
-1050	58.722	5.94642
-1040	59.3047	5.85798
-1030	59.9194	5.84473
-1020	60.568	5.91428
-1010	61.2522	6.04704
-1000	61.9741	6.2024
-990	62.7319	6.33733
-980	63.51	6.43662
-970	64.2893	6.49348
-960	65.0506	6.49875
-950	65.7747	6.43979
-940	66.4448	6.30872
-930	67.0535	6.12342
-920	67.5956	5.90859
-910	68.0661	5.68466
-900	68.4596	5.46451
-890	68.773	5.25557
-880	69.01	5.06917
-870	69.1761	4.91409
-860	69.2769	4.79064
-850	69.318	4.69035
-840	69.3066	4.60438
-830	69.2567	4.53936
-820	69.184	4.5023
-810	69.1043	4.49132
-800	69.0332	4.49561
-790	68.9861	4.50539
-780	68.9761	4.52946
-770	69.016	4.57593
-760	69.1186	4.64221
-750	69.2966	4.7157
-740	69.5559	4.78372
-730	69.8748	4.8497
-720	70.225	4.91651
-710	70.5777	4.97845
-700	70.9045	5.02264
-690	71.1795	5.03962
-680	71.3882	5.04101
-670	71.5184	5.03864
-660	71.5583	5.03461
-650	71.4957	5.02185
-640	71.3281	4.99485
-630	71.0894	4.96823
-620	70.8229	4.9555
-610	70.572	4.95879
-600	70.38	4.97026
-590	70.2825	4.98479
-580	70.2848	5.01715
-570	70.3844	5.07729
-560	70.5791	5.1597
-550	70.8664	5.2473
-540	71.2399	5.3285
-530	71.6767	5.41552
-520	72.1498	5.51126
-510	72.6322	5.59816
-500	73.0972	5.64556
-490	73.5238	5.63595
-480	73.9166	5.59962
-470	74.2863	5.56363
-460	74.6433	5.52884
-450	74.9985	5.47301
-440	75.3551	5.38213
-430	75.6868	5.3001
-420	75.9601	5.26871
-410	76.1413	5.29333
-400	76.1967	5.34394
-390	76.0859	5.39085
-380	75.7399	5.44828
-370	75.083	5.50525
-360	74.0396	5.50049
-350	72.5337	5.33845
-340	70.5278	4.95007
-330	68.136	4.40848
-320	65.5105	3.83626
-310	62.8038	3.34185
-300	60.168	2.98399
-290	57.7378	2.79271
-280	55.5781	2.84298
-270	53.736	3.10935
-260	52.2586	3.42617
-250	51.1932	3.60213
-240	50.5603	3.5471
-230	50.274	3.39568
-220	50.2215	3.30926
-210	50.2902	3.33246
-200	50.3676	3.36656
-190	50.3581	3.30876
-180	50.235	3.26179
-170	49.989	3.35766
-160	49.6105	3.60402
-150	49.0901	3.8847
-140	48.427	4.09169
-130	47.6554	4.2647
-120	46.818	4.45534
-110	45.9577	4.64744
-100	45.1173	4.75916
-90	44.3377	4.7054
-80	43.652	4.51803
-70	43.0912	4.28983
-60	42.6867	4.13279
-50	42.4694	4.15723
-40	42.4607	4.43685
-30	42.6428	4.94667
-20	42.9879	5.5843
-10	43.4684	6.22539
0	44.0565	6.76337
10	44.7245	7.15063
20	45.444	7.43403
30	46.1865	7.65175
40	46.9233	7.8029
50	47.626	7.86005
60	48.2696	7.82324
70	48.8433	7.78808
80	49.3398	7.81311
90	49.7518	7.86229
100	50.0722	7.8198
110	50.296	7.57446
120	50.4281	7.17073
130	50.4758	6.69533
140	50.4464	6.19937
150	50.3473	5.67294
160	50.1898	5.08352
170	50.002	4.51085
180	49.8162	4.08335
190	49.6645	3.86816
200	49.5791	3.80035
210	49.5852	3.75797
220	49.6784	3.75759
230	49.8475	3.8627
240	50.0812	4.07814
250	50.368	4.33528
260	50.6939	4.55846
270	51.0339	4.76265
280	51.3602	4.98027
290	51.6451	5.20943
300	51.861	5.40854
310	51.9879	5.52598
320	52.0381	5.56479
330	52.0316	5.55334
340	51.9885	5.52025
350	51.929	5.48615
360	51.8735	5.4636
370	51.8443	5.4656
380	51.8639	5.50051
390	51.9548	5.56638
400	52.1397	5.65181
410	52.4321	5.74513
420	52.8093	5.84791
430	53.2398	5.96116
440	53.6918	6.07899
450	54.1336	6.19048
460	54.5377	6.29073
470	54.8927	6.39765
480	55.1914	6.53028
490	55.4264	6.69889
500	55.5906	6.90481
510	55.6783	7.14777
520	55.6909	7.43666
530	55.6317	7.77303
540	55.5038	8.14607
550	55.3104	8.53593
560	55.0559	8.92294
570	54.7501	9.30041
580	54.4042	9.66051
590	54.0292	9.98974
600	53.6364	10.2707
610	53.2383	10.4901
620	52.8542	10.6545
630	52.5048	10.7715
640	52.2107	10.8432
650	51.9928	10.8668
660	51.8686	10.8426
670	51.8439	10.7875
680	51.9213	10.7162
690	52.1034	10.6331
700	52.393	10.5314
710	52.789	10.4019
720	53.2755	10.2501
730	53.833	10.0812
740	54.4419	9.89311
750	55.0828	9.67518
760	55.7362	9.41707
770	56.3841	9.1277
780	57.0082	8.81762
790	57.5906	8.48972
800	58.1132	8.13883
810	58.5619	7.7625
820	58.9373	7.38511
830	59.2442	7.03388
840	59.487	6.7235
850	59.6704	6.45196
860	59.7997	6.21105
870	59.8834	6.01396
880	59.9309	5.87318
890	59.9514	5.78528
900	59.9542	5.73132
910	59.946	5.69618
920	59.9232	5.70094
930	59.8793	5.7678
940	59.8082	5.89879
950	59.7034	6.07529
960	59.5594	6.2759
970	59.3728	6.50243
980	59.141	6.7505
990	58.8613	6.9968
1000	58.5311	7.20258
1010	58.1509	7.332
1020	57.7338	7.38582
1030	57.2961	7.37208
1040	56.8542	7.29207
1050	56.4244	7.14079
1060	56.0213	6.92178
1070	55.6525	6.67919
1080	55.324	6.46778
1090	55.0418	6.33228
1100	54.8119	6.29755
1110	54.6376	6.36855
1120	54.5123	6.54107
1130	54.4265	6.79661
1140	54.3711	7.10137
1150	54.3367	7.41328
1160	54.3143	7.69767
1170	54.2956	7.94891
1180	54.2727	8.16506
1190	54.2376	8.33689
1200	54.1822	8.44783
1210	54.1014	8.48381
1220	54.0001	8.45435
1230	53.8863	8.37136
1240	53.7677	8.23952
1250	53.6521	8.05608
1260	53.5462	7.81988
1270	53.452	7.55073
1280	53.3703	7.26752
1290	53.3019	6.97671
1300	53.2477	6.67125
1310	53.2075	6.34205
1320	53.1765	6.00354
1330	53.1492	5.6726
1340	53.1197	5.35466
1350	53.0824	5.04279
1360	53.0327	4.73671
1370	52.9709	4.47872
1380	52.8984	4.31221
1390	52.8167	4.24987
1400	52.7271	4.26952
1410	52.6295	4.34865
1420	52.5171	4.51197
1430	52.3815	4.76584
1440	52.2144	5.0693
1450	52.0073	5.34664
1460	51.7565	5.52478
1470	51.4772	5.59088
1480	51.189	5.54874
1490	50.9117	5.39437
1500	50.6652	5.11194
1510	50.4637	4.68878
1520	50.3003	4.16338
1530	50.1624	3.59464
1540	50.0376	3.04081
1550	49.9133	2.54818
1560	49.7768	2.14375
1570	49.613	1.85336
1580	49.4069	1.70592
1590	49.1431	1.69449
1600	48.8063	1.76224
1610	48.3856	1.8483
1620	47.8876	1.94072
1630	47.323	2.04064
1640	46.7027	2.13596
1650	46.0377	2.20001
1660	45.3407	2.20924
1670	44.6324	2.17485
1680	43.9353	2.11516
1690	43.2722	2.03878
1700	42.6655	1.94265
1710	42.138	1.827
1720	41.7123	1.72317
1730	41.4111	1.66164
1740	41.2569	1.64341
1750	41.2724	1.63579
1760	41.4708	1.60112
1770	41.8263	1.54481
1780	42.3039	1.48292
1790	42.8685	1.41436
1800	43.4848	1.31318
1810	44.1211	1.14461
1820	44.7592	0.914805
1830	45.3843	0.653858
1840	45.9816	0.399872
1850	46.5364	0.195485
1860	47.0347	0.076413
1870	47.4665	0.0396865
1880	47.8227	0.0324645
1890	48.094	0.0185004
1900	48.2713	0.0178782
1910	48.3459	0.0197949
1920	48.3109	0.0111269
1930	48.1596	0.0101681
1940	47.8856	0.0329593
1950	47.4823	0.0617219
1960	46.9382	0.0985213
1970	46.2206	0.150355
1980	45.2922	0.222788
1990	44.1151	0.319316
2000	42.6519	0.442482
