# Supplementary material for: Geophysical Insights from the First Geomagnetic Field Absolute Intensity Curve for Central Asia (2200BCE – 2000CE), and Implications for Archaeomagnetic Dating
Source: Research Square preprint supplement (doi:10.21203/rs.3.rs-6967561/v1), 2025-07-09
Supplement: Supplementary file 2 [file 872682dbc99bedb327156ec9.xlsx]

## Sheet: Hoja1
1.Kuchuk Tepe (Lat: 37.5º; Lon: 66.8º)
Sample	T1	T2	n	f	g	q	MAD	DANG	β	k	H	Ha	∆TRM	alt.	Hac
	(ºC)	(ºC)					(º)	(º)			(µT)	(µT)	(%)	(%)	(µT)
a) Kuchuk: 500 - 300 BCE
TRZ509B	150	520	11	0.804	0.89	24.2	2.7	1.1	-0.0296	-0.3011	105.6	82.1	-6.05985	8.94998	77.995
TRZ509C	200	520	10	0.74	0.871	24	4.4	1.6	-0.0269	-0.2774	100.9	83	-5.30468	11.8637	78.85
TRZ509D	200	520	10	0.724	0.877	16.8	3.5	1.6	-0.0378	-0.2752	93.6	81.2	-4.75419	11.223	77.14
TRZ513A	200	520	10	0.692	0.884	14.4	4	0.3	-0.0424	-0.2278	96.4	78.8	13.5974	2.50745	68.0852
TRZ513C	200	560	12	0.791	0.904	26.4	3	0.4	-0.0271	-0.1977	112.5	81.2	6.33807	0.523012	76.0535
TRZ513D	200	560	12	0.802	0.903	19.8	2.8	0.3	-0.0366	-0.268	106.9	86	9.95672	2.79173	77.4372
TRZ513E	200	560	12	0.775	0.9	23.8	3.2	0.8	-0.0293	-0.2684	97.2	80.4	0.739846	3.57097	72.36
TRZ517A	200	520	10	0.749	0.866	13.2	3.2	1.5	-0.0491	-0.3151	106.6	86.5	-2.45431	16.4083	82.175
TRZ517B	200	520	10	0.757	0.874	22.9	3.2	2.5	-0.0288	-0.1977	104	80.7	-1.69608	16.5837	76.665
TRZ517D	200	520	10	0.735	0.86	14.6	4.1	1.7	-0.0434	-0.3109	105	87.1	-4.39896	13.0252	82.745
TRZ517E	200	520	10	0.757	0.864	17.4	3.7	0.6	-0.0375	-0.202	108.9	82.5	-1.79832	12.3069	78.375
TRZ519A	150	520	11	0.805	0.888	25.6	2.8	1.3	-0.0279	-0.2863	61.5	69.4	-3.80357	15.1345	65.93
TRZ519B	200	520	10	0.727	0.873	14.8	4.6	1.8	-0.043	-0.3489	77.6	78.5	-7.51156	12.4315	74.575
TRZ519D	100	520	12	0.904	0.895	42.4	3.9	1	-0.0191	-0.1378	69	75.3	-5.54491	9.62324	71.535
TRZ519E	200	520	10	0.806	0.876	27.6	3.4	0.7	-0.0255	-0.1609	69.8	80.1	-4.66127	8.48536	76.095
b) Kuchuk: 1000 - 400 BCE
TRZ546A	150	560	13	0.856	0.904	43.4	3.7	0.8	-0.0178	-0.1516	63.3	71.8	3.67679	7.48078	68.4254
TRZ546B	150	560	13	0.873	0.905	40.4	3.1	0.2	-0.0195	-0.1502	62.6	67.6	4.05657	3.81802	64.8578
TRZ546C	150	490	10	0.72	0.882	15.4	4.2	0.6	-0.0412	-0.3121	95.1	70.4	4.19591	3.86128	67.4461
TRZ546D	100	490	11	0.768	0.889	23	2.8	1.6	-0.0297	-0.2655	103	71.6	5.91272	2.14635	67.3665
2. Molali Tepe: 1600 -1400 BCE (Lat: 38.1º; Lon: 67.7º)
Sample	T1	T2	n	f	g	q	MAD	DANG	β	k	H	Ha	∆TRM	alt.	Hac
	(ºC)	(ºC)					(º)	(º)			(µT)	(µT)	(%)	(%)	(µT)
MOL55A	250	540	9	0.714	0.86	39.5	1.6	1	-0.0155	-0.2684	63	59.5	11.9555	-4.62105	52.3865
MOL55B	200	545	11	0.79	0.88	42	1.5	0.9	-0.0165	-0.173	73.9	62.5	7.19508	-1.95903	58.0031
MOL55C	250	590	13	0.765	0.886	62.1	1.7	0.9	-0.0109	-0.1832	60	65.4	8.23094	-4.31295	60.017
MOL57A	150	390	6	0.635	0.79	17.7	2.8	1.1	-0.0283	-0.2721	48.8	56	9.9645	3.13665	50.4199
MOL57B	200	430	6	0.596	0.781	18.1	2.4	1.2	-0.0257	-0.2724	54.1	59.7	4.42618	-1.2802	57.0576
MOL57C	150	480	9	0.761	0.844	54.8	2	0.4	-0.0117	-0.2575	48.8	55.5	11	-3.78152	49.395
MOL58A	150	540	11	0.842	0.882	52.3	1	0.5	-0.0142	-0.1708	59.9	54.2	13.3002	1.97073	46.9913
MOL58B	250	530	9	0.588	0.848	17.1	2	1.2	-0.0291	-0.1273	52.6	49	10.5005	-1.68713	43.8548
MOL58C	250	530	9	0.578	0.861	26.8	1.6	0.8	-0.0185	-0.1568	61.6	55.4	13.6178	-4.16762	47.8557
MOL59A	150	520	10	0.808	0.869	50.7	2.1	1.3	-0.0138	-0.249	73.1	54.9	12.0148	2.37086	48.3039
MOL59B	150	430	7	0.673	0.822	23.7	1.3	0.6	-0.0234	-0.2313	83.3	60.6	3.8735	-1.68235	58.2527
MOL59C	200	480	8	0.664	0.837	31.3	1.8	0.5	-0.0178	0.0457	54.5	58.7	8.50312	-3.53372	53.7087
MOL60A	150	540	11	0.844	0.887	80.4	0.8	0.2	-0.0093	-0.13	54.8	57.9	3.32791	-3.21123	55.9731
MOL60B	150	545	11	0.837	0.884	48.8	1.3	0.3	-0.0152	-0.1916	80.6	57.4	5.61423	-2.4615	54.1774
MOL60C	150	530	11	0.821	0.895	58.7	1.1	0.8	-0.0125	-0.1596	80.7	61	3.16969	-2.2198	59.0665
MOL60D	150	480	9	0.737	0.87	47.4	1.8	0.5	-0.0135	-0.2216	70.1	55.1	8.0369	-6.08529	50.6717
MOL73A	150	500	9	0.723	0.846	31.9	1.1	0.8	-0.0192	-0.2803	66.3	55.8	7.91607	1.3738	51.3828
MOL73B	200	480	8	0.612	0.821	48.7	1.4	1.4	-0.0103	-0.2614	69.3	57.5	5.82311	1.55423	54.1517
MOL73C	150	530	11	0.824	0.871	41.3	1.7	1	-0.0173	-0.1963	50.9	52.8	8.02462	-4.17039	48.563
MOL75A	150	530	11	0.832	0.879	55.4	1.4	0.7	-0.0132	-0.1715	81.1	59.2	5.67961	-3.32838	55.8377
MOL75B	150	530	11	0.814	0.879	44.5	0.9	0.6	-0.0161	-0.2089	83	60.8	4.54388	-1.7357	58.0373
MOL75C	150	480	9	0.753	0.862	40.6	0.9	0.9	-0.016	-0.2209	79.9	59.2	4.64319	-1.78447	56.4512
MOL76A	200	540	10	0.753	0.866	43	2.1	1.2	-0.0152	0.0869	63.1	67.7	6.9948	9.48477	65.7367
MOL76B	150	430	7	0.627	0.823	15.6	1.2	2.7	-0.0331	-0.4232	75.4	53.5	3.32188	-2.9388	51.7228
MOL76C	200	530	10	0.706	0.878	42.2	1.9	1.4	-0.0147	-0.3156	79.5	61.1	2.42375	-1.78868	59.6191
MOL76D	300	530	8	0.583	0.843	21.6	1.3	0.9	-0.0228	-0.3336	87.3	63.1	6.78843	-3.71857	58.8165
MOL80A	300	545	9	0.592	0.855	39	1.9	1	-0.013	-0.3838	49.6	57.8	5.70223	0.196488	54.5041
MOL80B	250	560	11	0.695	0.883	48.7	2.2	0.9	-0.0126	-0.372	51.2	59.5	2.7856	-1.41223	57.8426
MOL80C	250	530	9	0.703	0.868	37.1	2.3	1.5	-0.0165	-0.3676	49.4	59.8	6.67352	-4.97133	55.8092
MOL83A	150	540	11	0.837	0.889	114.1	0.7	0.2	-0.0065	-0.1189	58.4	62.2	3.93536	-0.827671	59.7522
MOL83B	200	530	10	0.77	0.873	79.8	0.8	0.2	-0.0084	-0.1351	60	65.3	2.61215	0.222855	63.5943
MOL83C	250	560	11	0.759	0.891	25.6	2.1	0.4	-0.0264	-0.312	95.7	73.6	3.67859	-7.49696	71.208
MOL86A	200	590	14	0.83	0.899	137.5	1	1.8	-0.0054	-0.1156	66.7	59.3	3.2729	-2.50184	57.3592
MOL86B	410	590	9	0.512	0.813	33.5	2.6	3.5	-0.0124	0.261	63.2	59.8	4.99102	-3.20768	56.8154
MOL86C	150	590	15	0.874	0.906	124.4	0.9	0.4	-0.0064	-0.1133	74.5	61.4	5.54791	-4.63696	57.9936
MOL95A	200	560	12	0.664	0.905	28.5	2.8	0.4	-0.0211	-0.2125	69.7	55	6.18299	-3.10886	51.5994
MOL95B	150	560	13	0.702	0.91	57.5	1.3	1	-0.0111	-0.1516	77.4	61.8	3.17934	-3.17154	59.8352
MOL95C	150	560	13	0.697	0.912	45.2	3.1	1	-0.0141	-0.1906	72	56.5	4.0025	-4.3452	53.8445
MOL98A	150	520	10	0.775	0.867	59	1.2	0.3	-0.0114	-0.1642	62.4	54.7	8.3427	4.44343	50.1365
MOL98B	200	545	11	0.581	0.849	19	3.6	1.8	-0.026	-0.3444	70	59	1.831	-0.52394	57.9197
MOL98C	150	510	9	0.694	0.818	43.2	2.6	1.1	-0.0132	-0.2671	65.3	56.1	12.6613	-6.17882	48.997
3. Jarkutan (Lat: 37.6º; Lon: 67.0º)
Sample	T1	T2	n	f	g	q	MAD	DANG	β	k	H	Ha	∆TRM	alt.	Hac
	(ºC)	(ºC)					(º)	(º)			(µT)	(µT)	(%)	(%)	(µT)
a) Jarkutan: 1700 - 1400 a.C.
JKT491A	150	500	9	0.775	0.834	46.3	1.3	0.1	-0.014	-0.0145	53.9	52.7	4.19503	-4.10908	50.4892
JKT491B	200	430	6	0.592	0.763	13.9	1.9	0.6	-0.0325	-0.0844	55.7	52.7	2.66812	-2.01395	51.2939
JKT491C	150	480	9	0.75	0.841	21	1.4	0.9	-0.03	-0.0109	61.2	54.8	11.2361	-4.44799	48.6426
JKT492A	150	500	9	0.818	0.847	103.5	1	0.2	-0.0067	-0.0953	52.8	54.2	5.59684	-4.48527	51.1665
JKT492B	200	500	8	0.676	0.806	18.2	1.8	1	-0.03	-0.2538	70.2	56.3	1.9209	0.00777522	55.2185
JKT492C	200	480	8	0.668	0.825	22.9	1.4	0.6	-0.0241	-0.2213	66.6	55.3	6.89706	-4.55399	51.4859
JKT495A	150	520	10	0.82	0.851	40.2	1.4	0.7	-0.0174	-0.3139	51.8	49.1	7.10382	-2.84169	45.612
JKT495B	150	520	10	0.792	0.854	38.9	1.4	0.5	-0.0174	-0.3324	48.3	44.2	4.9432	-2.19716	42.0151
JKT495C	150	410	7	0.659	0.808	12	2.9	1.4	-0.0444	-0.5252	40.3	44.4	12.7657	-4.97577	38.732
JKT496A	150	500	9	0.749	0.863	29.7	1.9	1.2	-0.0217	-0.2827	36.9	49.3	10.0151	-6.9264	44.3625
JKT496B	250	500	7	0.599	0.824	12.8	1.5	0.9	-0.0386	-0.3918	63.7	59.1	7.44425	-7.18153	54.7004
JKT496C	250	530	9	0.665	0.857	17.7	1.4	1.5	-0.0322	-0.3971	61.7	63	9.77487	-6.54452	56.8418
JKT497A	200	430	6	0.839	0.752	37.6	0.8	0.3	-0.0168	0.0603	47.3	47.7	2.29168	-1.82005	46.6069
JKT497B	150	470	8	0.922	0.797	70.3	1.1	0.5	-0.0105	0.0514	51.6	54.2	2.71355	-2.92684	51.9507
JKT497C	250	450	6	0.775	0.757	27	1.1	1.2	-0.0217	0.0139	62.3	47.9	6.01725	-4.94313	45.0177
JKT498A	150	430	7	0.809	0.813	59.5	1.2	0.4	-0.0111	-0.175	69.5	53.4	6.56149	-2.24336	49.8962
JKT498B	150	430	7	0.783	0.823	68.4	1	0.3	-0.0094	-0.1988	52.2	49.7	6.02109	-2.20143	46.7075
JKT498C	150	450	8	0.767	0.834	35.3	1.8	1.4	-0.0181	-0.2223	53.3	51.7	3.79327	-0.718937	49.7389
JKT499A	250	430	5	0.77	0.662	46.8	0.9	0.5	-0.0109	-0.1913	42.3	39.4	0.112228	-0.901976	36.7602
JKT499B	200	390	5	0.796	0.67	30.4	1.7	1.1	-0.0176	-0.1378	56.2	44.8	1.98834	-3.32368	41.7984
JKT499C	200	410	6	0.837	0.749	51.6	1	1	-0.0122	-0.0387	57.6	44.3	6.69374	-5.64404	41.3347
JKT500A	150	430	7	0.719	0.782	32.2	0.7	1.2	-0.0175	-0.3622	51.7	49.5	1.68138	-1.33646	48.6677
JKT500B	200	480	8	0.638	0.78	17.1	4	3.8	-0.0292	-0.1362	43.6	46.4	10.5694	-5.79372	41.4958
JKT500C	150	410	7	0.698	0.784	27.6	1.6	1.3	-0.0198	-0.4375	47.3	47	5.73977	-2.62699	44.3023
b) Jarkutan: 2000 - 1700 a.C.
JKT481A	150	520	10	0.805	0.88	50.7	1.6	0.4	-0.0139	-0.0985	49.6	46.5	4.38898	-7.55166	43.1287
JKT481B	150	545	12	0.829	0.893	40	1.9	0.6	-0.0185	-0.1665	62.3	51.1	2.86469	-2.76353	49.6361
JKT481C	150	480	9	0.721	0.87	68.2	1.5	0.9	-0.0092	-0.0533	41	45.7	11.6158	-4.30292	40.3916
JKT482A	150	430	7	0.767	0.802	22.6	2.1	1.1	-0.0272	-0.0842	31.6	33.7	0.0472661	-1.7026	32.015
JKT482B	150	430	7	0.771	0.802	26.5	1.2	0.3	-0.0234	-0.0793	31.7	33	0.236321	-0.853046	31.35
JKT482C	150	410	7	0.761	0.814	29.4	2.8	1	-0.0211	-0.0338	48.2	37	6.00214	-6.11877	35.15
JKT483A	150	430	7	0.741	0.827	22.5	2.6	0.3	-0.0272	-0.0492	51.4	50.4	5.90694	-3.24892	47.4229
JKT483B	150	430	7	0.75	0.815	11.9	0.4	1	-0.0512	-0.0623	49.5	49.7	2.83202	-0.635906	48.2925
JKT483C	150	450	8	0.721	0.832	27.3	2.1	0.9	-0.022	-0.1719	69.2	51.6	10.6212	-4.4457	46.1195
JKT484A	150	540	11	0.847	0.894	38.7	1.3	0.8	-0.0196	-0.1906	57.7	57.7	3.56534	-5.87254	53.9495
JKT484B	150	545	12	0.886	0.895	60.7	1.3	0.7	-0.013	-0.1366	75	53	6.91811	-2.24851	49.3334
JKT484C	200	545	11	0.824	0.893	76	1.3	0.3	-0.0097	-0.1426	77.2	55.6	6.19256	-8.21821	52.1569
JKT486A	200	545	11	0.774	0.881	38.4	1.9	0.3	-0.0177	-0.277	54.1	49.9	2.02534	1.96744	48.8894
JKT486B	250	530	8	0.679	0.841	33.8	1.9	1.3	-0.0169	-0.2884	55.7	50.5	3.67486	-2.56249	48.6442
JKT486C	250	530	9	0.696	0.867	74	1.9	1.5	-0.0082	-0.1999	42	48.4	2.90923	-0.841265	46.9919
JKT474A	200	540	10	0.719	0.88	64.4	2	0.4	-0.0098	-0.1968	35.5	41.7	5.17404	-5.49778	39.761
JKT474B	150	545	12	0.767	0.898	43	1.7	0.7	-0.016	-0.2385	54.7	44.3	7.77808	-4.13923	40.8543
JKT474C	200	530	10	0.656	0.883	35.7	1.3	0.6	-0.0162	-0.3324	50.5	45.2	1.54209	0.529558	44.503
JKT475A	150	570	14	0.708	0.918	48.5	2.8	1.4	-0.0134	-0.064	60.8	48.5	3.12204	-0.375981	46.9858
JKT475B	250	585	13	0.646	0.911	35.7	2.8	0.7	-0.0165	-0.1313	72	55.1	5.8698	-1.51433	51.8657
JKT475C	200	560	12	0.592	0.898	29.2	2.9	1.7	-0.0182	0.0273	70.3	55.7	5.3542	-7.20789	53.1935
JKT478A	200	560	11	0.747	0.883	42.6	1.9	0.3	-0.0155	-0.0283	36.8	42.7	2.11092	-5.28527	38.4727
JKT478B	200	585	14	0.84	0.909	59.9	2.3	0.5	-0.0127	0.0006	34.1	41.4	9.9229	-1.485	37.3014
JKT478C	250	590	13	0.746	0.898	56.3	2.7	1.3	-0.0119	-0.1138	52	44.8	2.78202	-3.23224	40.3648
JKT480A	150	500	9	0.82	0.847	57.9	2.4	0.4	-0.012	-0.1733	44.7	43.2	6.74025	-3.68563	40.2882
JKT480B	150	430	7	0.569	0.816	17.1	4.3	5.3	-0.0272	-0.2056	39.9	31.7	2.82697	2.58666	30.8038
JKT480C	250	545	10	0.732	0.846	41.6	2.6	1	-0.0149	-0.112	52	43	-0.650393	0.504131	43.2797
